# Supplementary material for: A Comprehensive Biomarker Analysis of Microsatellite Unstable/Mismatch Repair Deficient Colorectal Cancer Cohort Treated with Immunotherapy
Source: MDPI journal article supplement (doi:10.3390/ijms24010118), 2022-12-21
Supplement: s1 [file s1]

**Supplementary Table S1.** This table summarizes: 1. Origin of samples used for study procedures 2. Anti-neoplastic treatments administered to patients before sample collection 3. Immune microenvironment analysis (regarding CD3<sup>+</sup>, CD8<sup>+</sup>, FOXP3<sup>+</sup> densities and PD-L1 expression) performed depending on tissue availability 3. IHC and PCR tests centrally performed for diagnosis of MSI-H/dMMR phenotype depending on tissue availability.

Chemo: chemotherapy. CPC: capecitabine. NE: non evaluable. NP: not performed. P: performed. Perit: peritoneal node. Prim: primary tumour. Pts: patients. RT: radiotherapy.

\*Patient 14 received FOLFOX plus panitumumab and FOLFIRI plus bevacizumab before sample collection.

| Pts | Sample origin | Previous treatments | CD3       | CD8       | FOXP3     | PD-L1     | IHC       | PCR |
|-----|---------------|---------------------|-----------|-----------|-----------|-----------|-----------|-----|
| 1   | Prim          | None                | P         | P         | P         | P         | P         | P   |
| 2   | Prim          | None                | P         | P         | P         | P         | P         | P   |
| 3   | Prim          | None                | P         | P         | P         | P         | P         | P   |
| 4   | Prim          | None                | P         | P         | P         | P         | P         | P   |
| 5   | Prim          | None                | P         | <b>NP</b> | P         | P         | P         | P   |
| 6   | Prim          | <b>RT/ CPC</b>      | <b>NP</b> | <b>NP</b> | <b>NP</b> | <b>NP</b> | P         | NE  |
| 7   | Prim          | None                | P         | P         | P         | <b>NP</b> | P         | P   |
| 8   | Prim          | None                | <b>NP</b> | <b>NP</b> | <b>NP</b> | <b>NP</b> | <b>NP</b> | P   |
| 9   | Prim          | None                | P         | P         | P         | P         | P         | P   |
| 10  | Prim          | None                | P         | P         | P         | <b>NP</b> | P         | P   |
| 11  | <b>Perit</b>  | None                | <b>NP</b> | <b>NP</b> | <b>NP</b> | <b>NP</b> | P         | P   |
| 12  | Prim          | None                | P         | P         | P         | P         | P         | P   |
| 13  | Prim          | None                | P         | P         | P         | P         | P         | P   |
| 14  | Prim          | <b>Chemo*</b>       | P         | P         | P         | P         | P         | P   |
| 15  | Prim          | None                | P         | P         | P         | P         | P         | P   |
| 16  | Prim          | None                | <b>NP</b> | <b>NP</b> | <b>NP</b> | <b>NP</b> | P         | P   |

**Supplementary Table S2.** NGS panel designed for the analysis of FFPE-derived genomic DNA.

|         |          |         |         |           |               |        |          |         |         |          |
|---------|----------|---------|---------|-----------|---------------|--------|----------|---------|---------|----------|
| ABL1    | BRAF     | CSF1R   | FAM123B | GATA6     | IRS1          | MDM2   | NTRK3    | PRKAR1A | RUNX1T1 | TERC     |
| ABL2    | BRCA1    | CTCF    | FAM175A | GID4      | IRS2          | MDM4   | NUP93    | PRKCI   | RYBP    | TERT     |
| ACVR1B  | BRCA2    | CTLA4   | FAM46C  | GLI1      | JAK1          | MED12  | PAK1     | PRKDC   | SDHA    | TET1     |
| AKT1    | BRD4     | CTNNA1  | FANCA   | GNA11     | JAK2          | MEF2B  | PAK3     | PRSS8   | SDHAF2  | TET2     |
| AKT2    | BRIP1    | CTNNB1  | FANCC   | GNA13     | JAK3          | MEN1   | PAK7     | PTCH1   | SDHB    | TGFBR1   |
| AKT3    | BTG1     | CUL3    | FANCD2  | GNAQ      | JUN           | MET    | PALB2    | PTEN    | SDHC    | TGFBR2   |
| ALK     | BTK      | CYLD    | FANCE   | GNAS      | KAT6A         | MITF   | PARK2    | PTPN11  | SDHD    | TMEM127  |
| ALOX12B | C11orf30 | DAXX    | FANCF   | GPR124    | KDM5A         | MLH1   | PARP1    | PTPRD   | SETD2   | TMPRSS2  |
| AMER1   | CARD11   | DCUN1D1 | FANCG   | GREM1     | KDM5C         | MLL    | PAX5     | PTPRS   | SF3B1   | TNFAIP3  |
| APC     | CASP8    | DDR2    | FANCL   | GRIN2A    | KDM6A         | MLL2   | PBRM1    | PTPRT   | SH2D1A  | TNFRSF14 |
| AR      | CBFB     | DICER1  | FANCM   | GRM3      | KDR           | MLL3   | PDCD1    | QKI     | SHH     | TOP1     |
| ARAF    | CBL      | DIS3    | FAS     | GSK3B     | KEAP1         | MPL    | PDCD1LG2 | RAC1    | SHQ1    | TOP2A    |
| ARFRP1  | CCND1    | DNMT1   | FAT1    | H3F3A     | KEL           | MRE11A | PDGFRA   | RAD50   | SLIT2   | TP53     |
| ARID1A  | CCND2    | DNMT3A  | FBXW7   | H3F3C     | KIT           | MSH2   | PDGFRB   | RAD51   | SMAD2   | TP63     |
| ARID1B  | CCND3    | DNMT3B  | FGF10   | HGF       | KLF4          | MSH6   | PDK1     | RAD51B  | SMAD3   | TRAF7    |
| ARID2   | CCNE1    | DOT1L   | FGF14   | HIST1H1C  | KLHL6         | MTOR   | PDPK1    | RAD51C  | SMAD4   | TSC1     |
| ARID5B  | CD274    | E2F3    | FGF19   | HIST1H2BD | KMT2A         | MUTYH  | PHOX2B   | RAD51D  | SMARCA4 | TSC2     |
| ASXL1   | CD276    | EED     | FGF23   | HIST1H3B  | KMT2C         | MYC    | PIK3C2B  | RAD52   | SMARCB1 | TSHR     |
| ASXL2   | CD79A    | EGFL7   | FGF3    | HNFA      | KMT2D         | MYCL   | PIK3C2G  | RAD54L  | SMARCD1 | U2AF1    |
| ATM     | CD79B    | EGFR    | FGF4    | HRAS      | KRAS          | MYCL1  | PIK3C3   | RAF1    | SMO     | VEGFA    |
| ATR     | CDC73    | EIF1AX  | FGF6    | HSD3B1    | LATS1         | MYCN   | PIK3CA   | RANBP2  | SNCAIP  | VHL      |
| ATRX    | CDH1     | EP300   | FGFR1   | HSP90AA1  | LATS2         | MYD88  | PIK3CB   | RARA    | SOC3    | VTCN1    |
| AURKA   | CDK12    | EPCAM   | FGFR2   | ICOSLG    | LMO1          | MYOD1  | PIK3CD   | RASA1   | SOX10   | WISP3    |
| AURKB   | CDK4     | EPHA3   | FGFR3   | IDH1      | LRP1B         | NBN    | PIK3CG   | RB1     | SOX17   | WT1      |
| AXIN1   | CDK6     | EPHA5   | FGFR4   | IDH2      | LYN           | NCOR1  | PIK3R1   | RBM10   | SOX2    | XIAP     |
| AXIN2   | CDK8     | EPHA7   | FH      | IFNGR1    | LZTR1         | NF1    | PIK3R2   | RECQL4  | SOX9    | XPO1     |
| AXL     | CDKN1A   | EPHB1   | FLCN    | IGF1      | MAD2L2 (REV7) | NF2    | PIK3R3   | REL     | SPEN    | YAP1     |
| B2M     | CDKN1B   | ERBB2   | FLT1    | IGF1R     | MAGI2         | NFE2L2 | PIM1     | RET     | SPOP    | YES1     |
| BAP1    | CDKN2A   | ERBB3   | FLT3    | IGF2      | MALT1         | NFKBIA | PLCG2    | RFWD2   | SPTA1   | ZBTB2    |
| BARD1   | CDKN2B   | ERBB4   | FLT4    | IKBKE     | MAP2K1        | NKX2-1 | PLK2     | RHEB    | SRC     | ZNF217   |
| BBC3    | CDKN2C   | ERCC2   | FOXA1   | IKZF1     | MAP2K2        | NKX3-1 | PMAIP1   | RHOA    | STAG2   | ZNF703   |
| BCL2    | CEBPA    | ERCC3   | FOXL2   | IL10      | MAP2K4        | NOTCH1 | PMS1     | RICTOR  | STAT3   |          |
| BCL2L1  | CHD2     | ERCC4   | FOXP1   | IL7R      | MAP3K1        | NOTCH2 | PMS2     | RIT1    | STAT4   |          |
| BCL2L11 | CHD4     | ERCC5   | FRS2    | INHBA     | MAP3K13       | NOTCH3 | PNRC1    | RNF43   | STK11   |          |
| BCL2L2  | CHEK1    | ERG     | FUBP1   | INPP4A    | MAP3K5        | NOTCH4 | POLD1    | ROS1    | STK40   |          |
| BCL6    | CHEK2    | ERRF1   | GABRA6  | INPP4B    | MAPK1         | NPM1   | POLE     | RPS6KA4 | SUFU    |          |
| BCOR    | CIC      | ESR1    | GATA1   | INSR      | MAPK7         | NRAS   | PPP2R1A  | RPS6KB2 | SUZ12   |          |
| BCORL1  | CREBBP   | ETV1    | GATA2   | IRAK4     | MAX           | NSD1   | PPP2R2A  | RPTOR   | SYK     |          |
| BLM     | CRKL     | ETV6    | GATA3   | IRF2      | MCL1          | NTRK1  | PRDM1    | RSP02   | TAF1    |          |
| BMPR1A  | CRLF2    | EZH2    | GATA4   | IRF4      | MDC1          | NTRK2  | PREX2    | RUNX1   | TBX3    |          |

### **Supplementary Materials. Library preparation**

DNA extraction from FFPE samples (ten 10-µm FFPE tissue sections) was performed with the automated system Maxwell16 FFPE plus LEV DNA purification kit (Promega). Briefly, 500 nanograms of purified DNA previously sheared into 150-200 base pairs fragments (Covaris S2), followed by library preparation according to manufacturer's instructions (Agilent SureSelect). The genes of interest were captured using the biotinylated custom baits from Agilent SureSelect customized oligo pool. All samples were sequenced on an Illumina platform to an average coverage of x415.

### **Supplementary Materials. Bioinformatic analysis**

Libraries were sequenced in a HiSeq2500 instrument (Illumina), 2X100 Paired-end. Sequencing reads were quality controlled with FastQC and mapped to the human reference (hg19) with bwa (v.0.7.17) with default settings. The resulting BAM files were processed using SAMtools (v.1.7) and the Genome Analysis ToolKit (GATK) release 3.7. Variants were called using VarScan (v2.4.3), Mutect (v2) and Strelka with the following parameters: minimum variant allele frequency (VAF) of 5%, minimum coverage of 8 reads, at least 7 reads that confirm the mutation with a p-value below 0.05. Due to the hypermutant nature of the MSI-H/dMMR tumors, only mutations detected with at least two of the three variant callers were considered for further analysis.

Filtering of frequent SNPs in the population was accomplished with the 1000 genome database [1], the exome variant server database [2] and the GnomAD database [3] according to a population VAF > 0.0001 described in GnomAD [4]. Clinical significance classification of the variants was performed using the following databases COSMIC<sup>5</sup>, cBioPortal<sup>6</sup>, ClinVar<sup>7</sup>, OncoKB<sup>8</sup> and VarSome<sup>9</sup>.

Manual curation of the data was performed among all the knowledge databases for harmonization of their criteria.

For the calculation of copy number alterations (CNA), the tool CNVkit based on a parent –specific copy number segmentation method (PSCBS) was used; each tumour was compared with a home-made second reference sample created by pooling DNA from 150 tumours extracted from FFPE tissues from different tumour types, and mixed in equal amounts.

For the analysis of loss of heterozygosity (LOH) the SNP backbone captured data was used, the analysis was performed with SAMtools (v.1.7.) and results were plotted with ggplot2.

#### **Supplementary Materials. Immune microenvironment analysis**

IHC was performed on consecutive sections using CD3, CD8, FOXP3, PD-L1 and Pan-Keratin antibodies. Briefly, the slides were heated and deparaffinized before heat-induced antigen retrieval. Primary antibodies were applied as indicated in the following table.

| Antigen     | Clone           | Dilution     | Manufacturer and reference           | Primary antibody incubation time and temperature |
|-------------|-----------------|--------------|--------------------------------------|--------------------------------------------------|
| CD3         | 2GV6            | Ready-to-use | Ventana Medical Systems (# 790-4341) | 32 min 36°C                                      |
| CD8         | 144B            | 1/100        | Dako Agilent (#M7103)                | 32 min RT                                        |
| FOXP3       | SP97            | 1/100        | ABCAM                                | 60 min RT                                        |
| PD-L1       | SP263           | Ready-to-use | Ventana Medical Systems (#741-4905)  | 16 min 36°C                                      |
| Pan Keratin | AE1/AE3 & PCK26 | Ready-to-use | Ventana Medical Systems (#760-2595)  | 36 min RT                                        |

Reactions were detected using the UltraView Universal DAB Detection kit. Finally, the slides were counterstained with Haematoxylin and mounted with a Xylol based mounting medium. The entire process was performed in the Benchmark ULTRA system and all reagents were from Ventana Medical Systems. Slides were digitalized using a slide scanner (NanoZoomer 2.0-HT, Hamamatsu Photonics, Japan) and quality checked by a pathologist before DIA. For IHC staining quantification, we used different image analysis algorithms created through the Author™ module of Visiopharm®. CD3, CD8 and PD-L1 slides were aligned with the Pan-Keratin slide using Tissuealign® (Visiopharm®). In the case of CD3, CD8 and FOXP3, Pan-Keratin was used to select the tumour and the surrounding stroma (200µm from the tumour) areas

where densities of stained immune cells were calculated. For PD-L1 analysis, the Composite Positive Score (CPS) was calculated dividing the number of PD-L1 positive cells by the total number of Pan-Keratin positive tumour cells multiplied by 100<sup>10</sup>.

#### **Supplementary material. Statistical analysis**

A descriptive analysis of different variables included in the study was performed. Continuous variables were expressed as mean, median and interquartile range (IQR), and categorical variables were expressed as absolute values and percentages.

For univariate analysis, we used the Fisher's exact test for categorical variables and Student's *t* test or Mann-Whitney test for continuous variables, as appropriate after checking normality with the Shapiro-Wilk test. Spearman's correlation was used to evaluate association between continuous variables.

Survival analysis was calculated using the Kaplan-Meier method and log-rank test was used for statistical comparisons. Cox proportional-hazard models were used to obtain hazard ratios (HRs) with 95% confidence intervals (CIs). All P values were two-sided, and values less than 0.05 were considered statistically significant. In case of multiple testing, P values were adjusted using the Benjamini and Hochberg method.

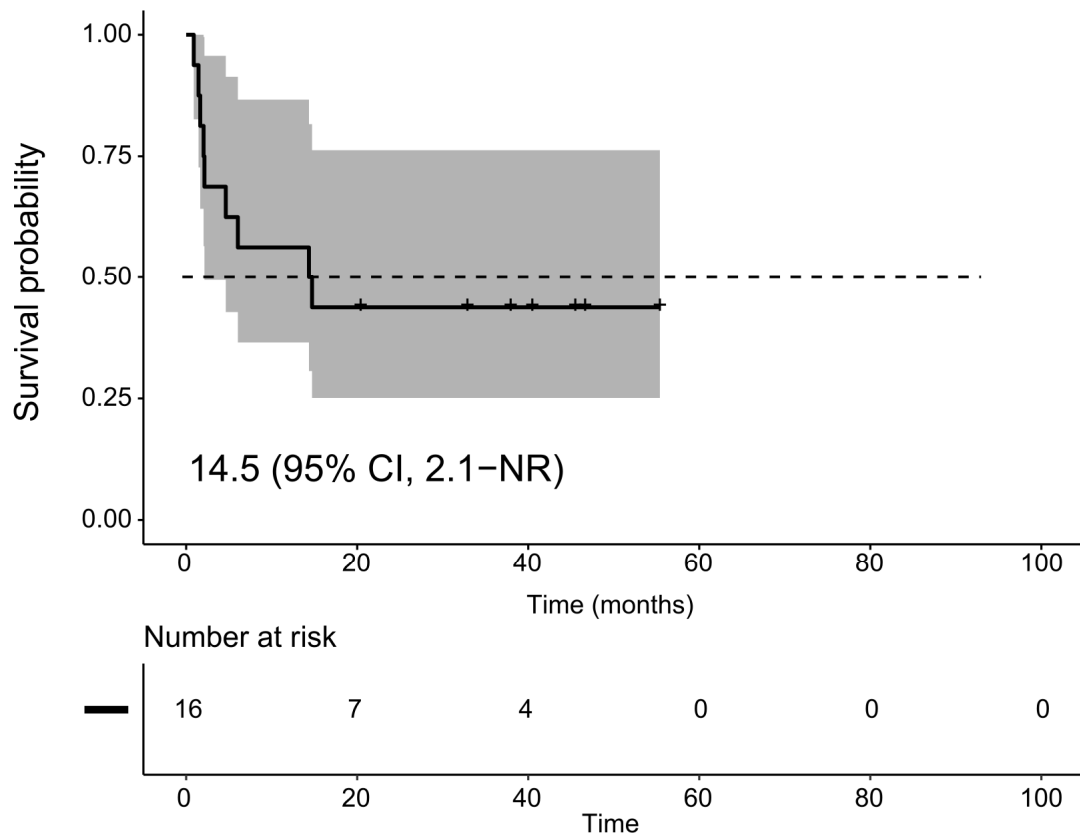

**Supplementary Figure S1.** Progression-free survival (PFS) curve and confidence intervals (grey area) for the entire cohort. The median PFS was 14.5 months. NR: not reached.

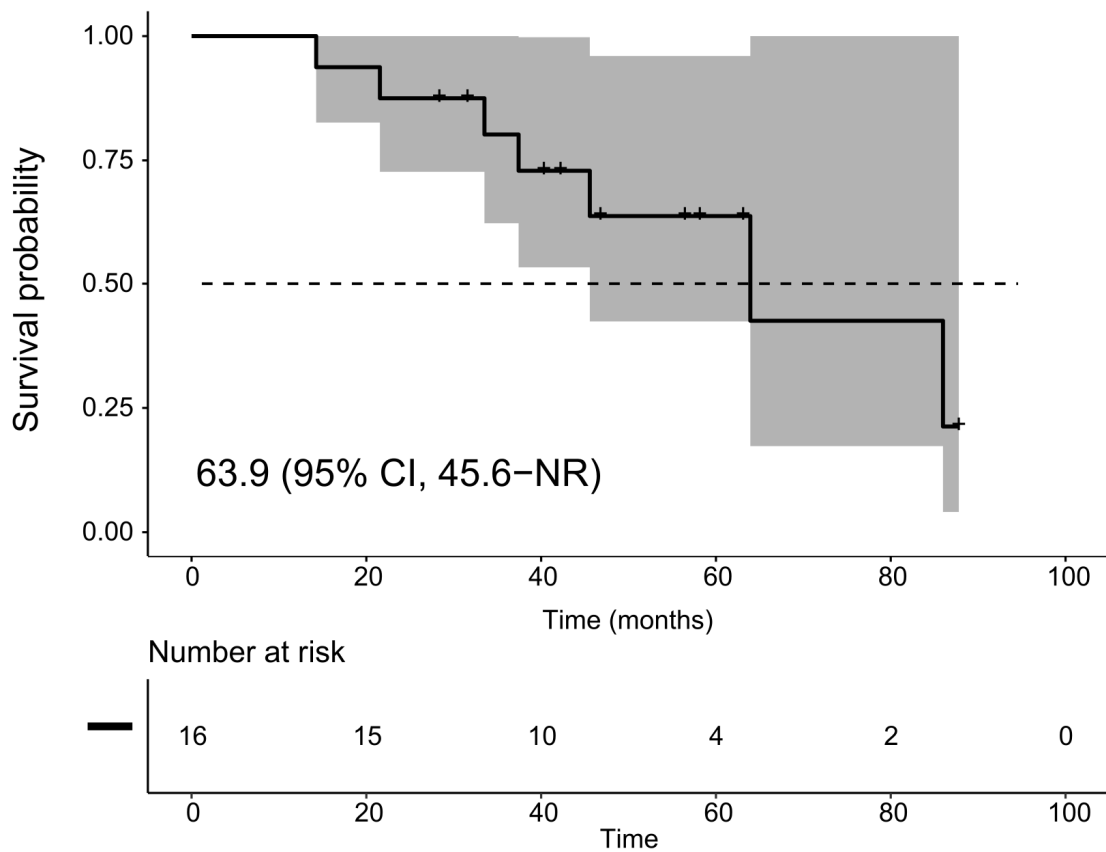

**Supplementary Figure S2.** Overall survival (OS) curve and confidence intervals (grey area) for the entire cohort. The median OS of metastatic disease was 63.9 months. NR: not reached.

**Supplementary Excel S1.** – (file “NGS results MSI final”). Results of NGS panel, CNA and LOH for each patient included in the study. Analysis of LOH and CNA provided homogeneous results for all patients, reporting no alterations in any of the samples, except for a single copy loss of *NF1* gene in patient 6.



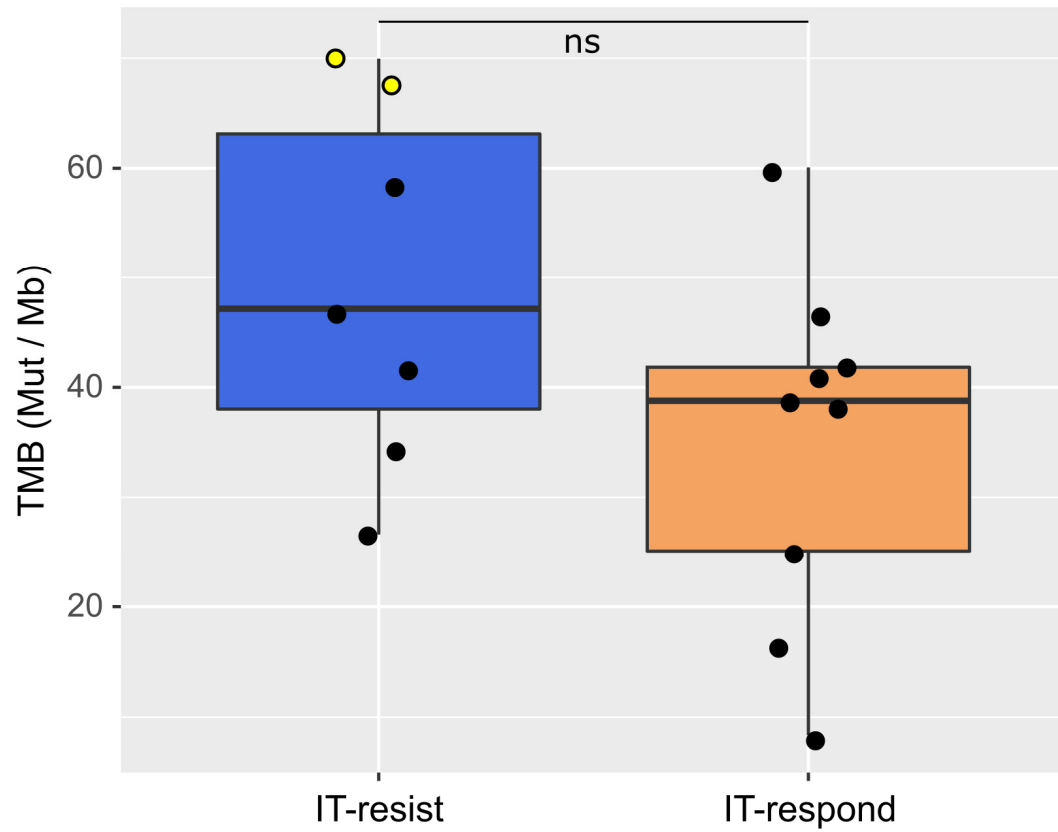

**Supplementary Figure S3.** TMB (mutations/Mb) was calculated for each patient (dots) according to mutations detected in the NGS targeted panel. Median value of TMB is: 47.2 mut/Mb in IT-resistant, and 38.8 mut/Mb in IT-responder. The differences are not statistically significant. Yellow dots represent patients with the highest TMB. ns: not significant.

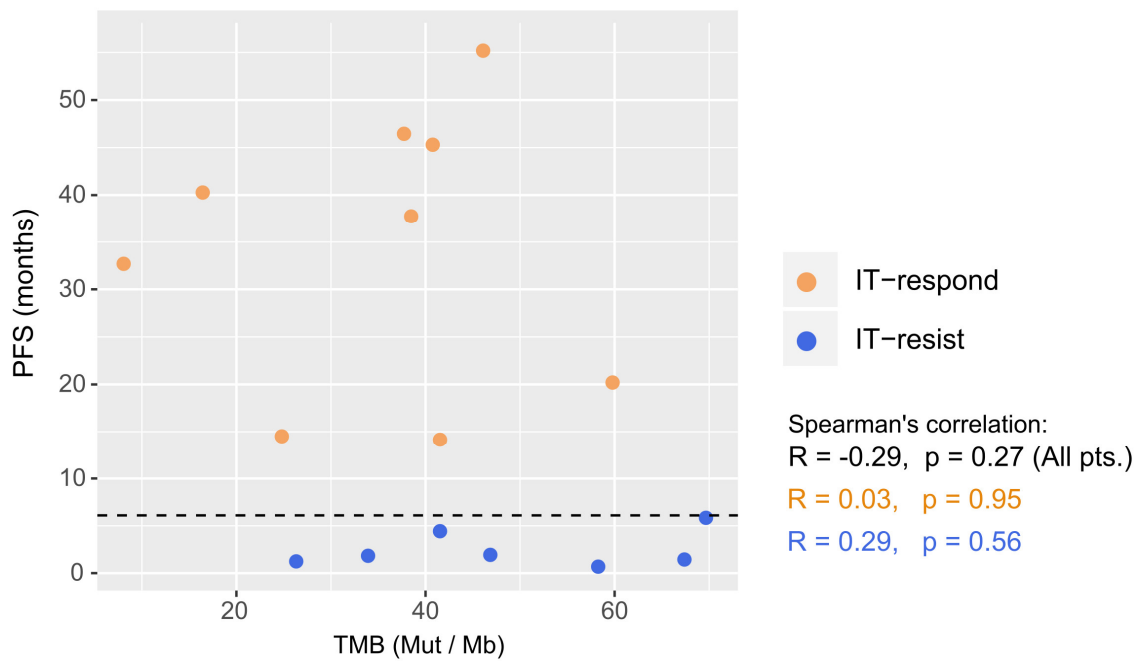

**Supplementary Figure S4.** Correlation between PFS (months) and TMB (mut/Mb). A trend is observed suggesting higher TMB correlates with worse PFS, but without statistical significance. Dashed line indicated the previous defined cut-off of 6 months for PFS. pts: patients.

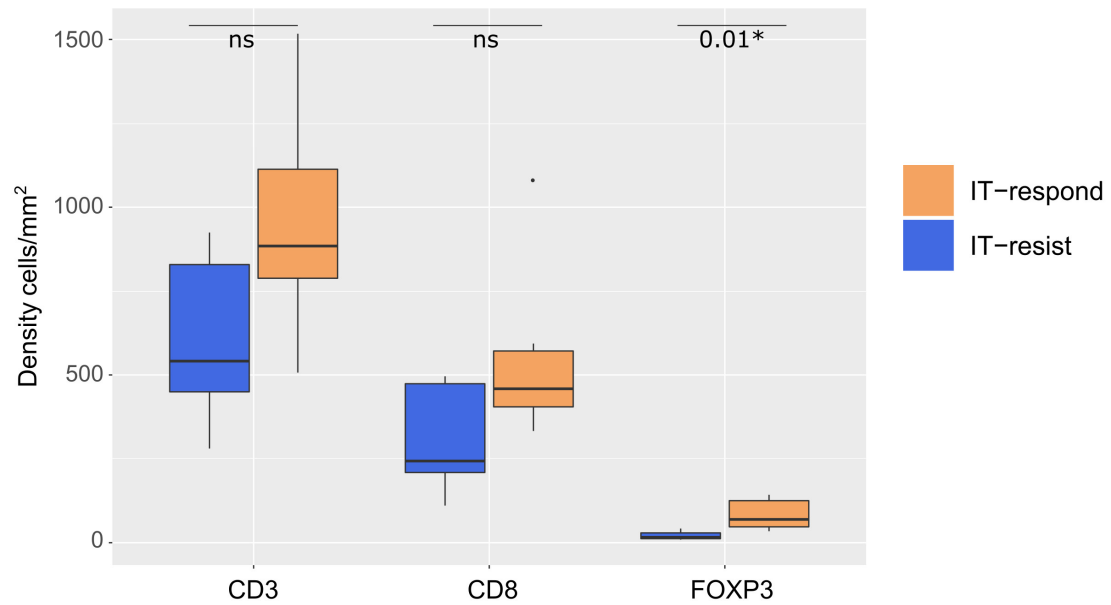

**Supplementary Figure S5.** Densities of CD3<sup>+</sup>, CD8<sup>+</sup> and FOXP3<sup>+</sup> lymphocytes according to IT-responder and IT-resistant. Median values are higher in IT-responder, reaching the statistical significance in FOXP3<sup>+</sup> subpopulation. ns: not significant.

**Supplementary Excel S2.** Excel detailing data related with Figure 3.

| Patient                                                    | IT-resist |           |           |           |           |          |         |          |           |           | IT-resist |           |           |          |           |           |          |          |          |          |
|------------------------------------------------------------|-----------|-----------|-----------|-----------|-----------|----------|---------|----------|-----------|-----------|-----------|-----------|-----------|----------|-----------|-----------|----------|----------|----------|----------|
|                                                            | 1         | 2         | 3         | 4         | 5         | 6        | 7       | 8        | 9         | 10        | 11        | 12        | 13        | 14       | 15        | 16        | 17       | 18       | 19       | 20       |
| Mechanism of dMMR/MSI-H phenotype                          | Germine   | Germine   | Germine   | Sporadic  | Sporadic  | Sporadic | Germine | Sporadic | Sporadic  | Sporadic  | Sporadic  | Sporadic  | Sporadic  | Sporadic | Sporadic  | Sporadic  | Sporadic | Sporadic | Sporadic | Sporadic |
| APC                                                        | wt        | wt        | wt        | wt        | wt        | wt       | wt      | wt       | wt        | wt        | wt        | wt        | wt        | wt       | wt        | wt        | wt       | wt       | wt       | wt       |
| APC Bi                                                     | mut       | mut       | mut       | wt        | wt        | wt       | wt      | wt       | wt        | wt        | wt        | wt        | wt        | wt       | wt        | wt        | wt       | wt       | wt       | wt       |
| TP53                                                       | wt        | wt        | wt        | wt        | wt        | wt       | wt      | wt       | wt        | wt        | wt        | wt        | wt        | wt       | wt        | wt        | wt       | wt       | wt       | wt       |
| KRAS                                                       | wt        | wt        | wt        | wt        | wt        | wt       | wt      | wt       | wt        | wt        | wt        | wt        | wt        | wt       | wt        | wt        | wt       | wt       | wt       | wt       |
| BRAF V600E                                                 | wt        | wt        | wt        | wt        | wt        | wt       | wt      | wt       | wt        | wt        | wt        | wt        | wt        | wt       | wt        | wt        | wt       | wt       | wt       | wt       |
| EGFR                                                       | wt        | wt        | wt        | wt        | wt        | wt       | wt      | wt       | wt        | wt        | wt        | wt        | wt        | wt       | wt        | wt        | wt       | wt       | wt       | wt       |
| PIK3CA                                                     | wt        | wt        | wt        | wt        | wt        | wt       | wt      | wt       | wt        | wt        | wt        | wt        | wt        | wt       | wt        | wt        | wt       | wt       | wt       | wt       |
| RNF43                                                      | wt        | wt        | wt        | wt        | wt        | wt       | wt      | wt       | wt        | wt        | wt        | wt        | wt        | wt       | wt        | wt        | wt       | wt       | wt       | wt       |
| CTNNB1                                                     | wt        | wt        | wt        | wt        | wt        | wt       | wt      | wt       | wt        | wt        | wt        | wt        | wt        | wt       | wt        | wt        | wt       | wt       | wt       | wt       |
| B2M                                                        | wt        | wt        | wt        | wt        | wt        | wt       | wt      | wt       | wt        | wt        | wt        | wt        | wt        | wt       | wt        | wt        | wt       | wt       | wt       | wt       |
| B2M Bi                                                     | wt        | wt        | wt        | wt        | wt        | wt       | wt      | wt       | wt        | wt        | wt        | wt        | wt        | wt       | wt        | wt        | wt       | wt       | wt       | wt       |
| JAK 1,2,3                                                  | wt        | wt        | wt        | wt        | wt        | wt       | wt      | wt       | wt        | wt        | wt        | wt        | wt        | wt       | wt        | wt        | wt       | wt       | wt       | wt       |
| PTEN                                                       | wt        | wt        | wt        | wt        | wt        | wt       | wt      | wt       | wt        | wt        | wt        | wt        | wt        | wt       | wt        | wt        | wt       | wt       | wt       | wt       |
| PTEN Bi                                                    | wt        | wt        | wt        | wt        | wt        | wt       | wt      | wt       | wt        | wt        | wt        | wt        | wt        | wt       | wt        | wt        | wt       | wt       | wt       | wt       |
| ARID1A                                                     | wt        | wt        | wt        | wt        | wt        | wt       | wt      | wt       | wt        | wt        | wt        | wt        | wt        | wt       | wt        | wt        | wt       | wt       | wt       | wt       |
| ARID1A Bi                                                  | wt        | wt        | wt        | wt        | wt        | wt       | wt      | wt       | wt        | wt        | wt        | wt        | wt        | wt       | wt        | wt        | wt       | wt       | wt       | wt       |
| MLH1                                                       | wt        | wt        | wt        | wt        | wt        | wt       | wt      | wt       | wt        | wt        | wt        | wt        | wt        | wt       | wt        | wt        | wt       | wt       | wt       | wt       |
| MLH1 Bi                                                    | wt        | wt        | wt        | wt        | wt        | wt       | wt      | wt       | wt        | wt        | wt        | wt        | wt        | wt       | wt        | wt        | wt       | wt       | wt       | wt       |
| MSH2                                                       | wt        | wt        | wt        | wt        | wt        | wt       | wt      | wt       | wt        | wt        | wt        | wt        | wt        | wt       | wt        | wt        | wt       | wt       | wt       | wt       |
| MSH2 Bi                                                    | wt        | wt        | wt        | wt        | wt        | wt       | wt      | wt       | wt        | wt        | wt        | wt        | wt        | wt       | wt        | wt        | wt       | wt       | wt       | wt       |
| MSH6                                                       | wt        | wt        | wt        | wt        | wt        | wt       | wt      | wt       | wt        | wt        | wt        | wt        | wt        | wt       | wt        | wt        | wt       | wt       | wt       | wt       |
| MSH6 Bi                                                    | wt        | wt        | wt        | wt        | wt        | wt       | wt      | wt       | wt        | wt        | wt        | wt        | wt        | wt       | wt        | wt        | wt       | wt       | wt       | wt       |
| TMB (Mut/Mb)                                               | 46,39     | 38,02     | 41,06     | 16,73     | 38,78     | 8,37     | 60,08   | 25,10    | 41,83     | 69,96     | 41,83     | 47,15     | 34,22     | 67,68    | 26,62     | 58,56     |          |          |          |          |
| fs (indels)                                                | 9,0       | 11,0      | 15,0      | 4,0       | 20,0      | 2,0      | 8,0     | 13,0     | 16,0      | 24,0      | 14,0      | 18,0      | 11,0      | 16,0     | 7,0       | 24,0      |          |          |          |          |
| % fs vs TOTAL                                              | 14,8      | 22,0      | 27,8      | 18,2      | 39,2      | 18,2     | 10,1    | 39,4     | 29,1      | 26,1      | 25,5      | 29,0      | 24,4      | 18,0     | 20,0      | 31,2      |          |          |          |          |
| COSMIC signature Defective DNA MMR / MSI (small INDELS)    | 0,7       | 0,4       | 0,3       | 0,7       | 0,6       | 0,5      | 0,3     | 0,2      | 0,5       | 0,6       | 0,9       | 0,3       | 0,4       | 0,5      | 0,5       | 0,3       |          |          |          |          |
| COSMIC signature Others                                    | 0,3       | 0,6       | 0,7       | 0,3       | 0,4       | 0,5      | 0,7     | 0,8      | 0,5       | 0,4       | 0,1       | 0,7       | 0,6       | 0,5      | 0,5       | 0,7       |          |          |          |          |
| DENSITY CD8/mm <sup>2</sup>                                | 334,0     | 1081,0    | 505,0     | 403,0     | NA        | NA       | 593,0   | NA       | 413,0     | 110,0     | NA        | 242,0     | 496,0     | 208,0    | 474,0     | NA        |          |          |          |          |
| DENSITY CD3/mm <sup>2</sup>                                | 507,0     | 1517,0    | 885,0     | 884,0     | 695,0     | NA       | 1170,0  | NA       | 1055,0    | 282,0     | NA        | 450,0     | 830,0     | 541,0    | 925,0     | NA        |          |          |          |          |
| DENSITY FOXP3/mm <sup>2</sup>                              | 40,0      | 140,0     | 109,0     | 54,0      | 69,0      | NA       | 142,0   | NA       | 34,0      | 9,0       | NA        | 29,0      | 42,0      | 12,0     | 16,0      | NA        |          |          |          |          |
| PD-L1 CPS                                                  | 1,0       | 30,0      | 5,0       | 10,0      | 90,0      | NA       | NA      | NA       | 0,5       | NA        | NA        | 5,0       | 5,0       | 0,5      | 2,0       | NA        |          |          |          |          |
| IHC results (prot expression lost)                         | MSH2      | MLH1/MSI2 | MLH1/MSI2 | MLH1/MSI2 | MLH1/MSI2 | MLH1     | MSH6    | NA       | MLH1/MSI2 | MLH1/MSI2 | MLH1/MSI2 | MLH1/MSI2 | MLH1/MSI2 | MSI2     | MLH1/MSI2 | MLH1/MSI2 |          |          |          |          |
| Number of unstable microsatellites (PCR)                   | 5         | 4         | 5         | 5         | 5         | NA       | 3       | 4        | 4         | 0         | 3         | 1         | 4         | 3        | 0         | 4         |          |          |          |          |
| PROLIFERATING CD3                                          | 9         | 16        | 36        | 3         | 13        | NA       | 28      | NA       | 8         | 1         | NA        | 14        | 9         | 7        | 6         | NA        |          |          |          |          |
| PROLIFERATING CD8                                          | 12        | 20        | NA        | 5         | NA        | NA       | 35      | NA       | 11        | 2         | NA        | 14        | 17        | 12       | NA        | NA        |          |          |          |          |
| PROLIFERATING FOXP3                                        | 8         | 24        | 27        | 5         | 16        | NA       | 33      | NA       | 12        | 0         | NA        | 17        | 15        | 13       | 15        | NA        |          |          |          |          |
| <i>Fusobacterium nucleatum</i> (bacterial/m <sup>2</sup> ) | 0,9       | 246,3     | NA        | 3,7       | 63,2      | NA       | 0,1     | NA       | 0,6       | 466,7     | 0         | 10,2      | 5         | 8,2      | 0,2       | NA        |          |          |          |          |

## SUPPLEMENTARY MATERIAL REFERENCES

1. Altshuler DM, Durbin RM, Abecasis GR et al. An integrated map of genetic variation from 1,092 human genomes. *Nature* 2012; 491(7422):56–65.
2. [esp.gs.washington.edu/drupal](https://esp.gs.washington.edu/drupal).
3. Lek M, Karczewski KJ, Minikel E V, et al. Analysis of protein-coding genetic variation in 60,706 humans. *Nature* 2016; 536(7616):285–291.
4. Karczewski KJ, Francioli LC, Tiao G, et al. The mutational constraint spectrum quantified from variation in 141,456 humans. *Nature* 2020; 581(7809):434–443.
5. COSMIC. Catalogue Of Somatic Mutations In Cancer. Available at: <https://cancer.sanger.ac.uk>. Year 2021.
6. cBioPortal for cancer genomics. Available at: <https://cbioportal.org>. Year 2021
7. ClinVar -NCBI-NIH. Available at: <https://ncbi.nlm.nih.gov/clinvar/>. Year 2021.
8. OncoKB. Available at: <https://oncokb.org/>. Year 2021
9. The Human Genomic Variant. Available at: <https://varsome.com>. Year 2021.
10. Kulangara K, Zhang N, Corigliano E, et al. Clinical utility of the combined positive score for programmed death ligand-1 expression and the approval of pembrolizumab for treatment of gastric cancer. *Arch. Pathol. Lab. Med.* 2019; 143(3):330–337.
